# Supplementary material
Source: PubMed Central journal article supplement (PMC4323366)
Supplement: ijbsv11p0266s1.pdf [file ijbsv11p0266s1.pdf]

**Supplementary Table 1. Sequence of primers used for As-PCR and hemi-nPCR**

| <b>Primer</b> | <b>Sequence</b>                          | <b>Reference/sequence source</b> |
|---------------|------------------------------------------|----------------------------------|
| GSTM1-P1      | 5'- CTG CCC TAC TTG ATT GAT GGG-3'       | (16)                             |
| GSTM1-P2      | 5'- CTG GAT TGT AGC AGA TCA TGC-3'       | (16)                             |
| GSTM1-P3      | 5'- GCT CAC AAG ATC ACC CAG AGC-3'       | (18)                             |
| ACE-P1        | 5'- CTG GAG ACC ACT CCC ATC CTT TCT-3'   | (12, 17)                         |
| ACE-P2        | 5'- GAT GTG GCC ATC ACA TTC GTC AGA-3'   | (12, 17)                         |
| ACE-P3        | 5'- TCA CAG GAC TGC TGA GGC CCT GCA-3'   | (17)                             |
| ACE-P4        | 5'- CCT CCC ATG CCC ATA ACA GGT CTT-3'   | (17)                             |
| ACE-II        | 5'-CCA CAT AAA AGT GAC TGT ATC ACG CC-3' | GenBank access no. 62855         |

Abbreviations: GSTM1, glutathione S-transferase M1; ACE, angiotensin-converting enzyme
